# Supplementary material for: Using copper sulfide nanoparticles as cross-linkers of tumor microenvironment responsive polymer micelles for cancer synergistic photo-chemotherapy
Source: Royal Society of Chemistry journal article supplement (doi:10.1039/d0nr06866g), 2021-01-01
Supplement: d0nr06866g1.pdf [file d0nr06866g1.pdf]

# Using Copper Sulfide Nanoparticles as a Cross-linker of Tumor microenvironment Responsive Polymer Micelles for Cancer Synergistic Photo-chemotherapy

Zhengzhong, Wu<sup>1</sup>; Panfeng, Zhang<sup>1</sup>; Peiwen, Wang; <sup>1</sup> Zizhen, Wang; <sup>1</sup> Xianglin, Luo<sup>1,2\*</sup>

<sup>1</sup>College of Polymer Science and Engineering, and <sup>2</sup>State Key laboratory of Polymer Materials engineering, Sichuan University, Chengdu 610065, PR China.

\*Correspondence: Xianglin, Luo,

†College of Polymer Science and Engineering, Sichuan University, Chengdu 610065, PR China.

Tel/fax +86 28 8546 6166. Email luoxl\_scu@126.com

## Supporting information

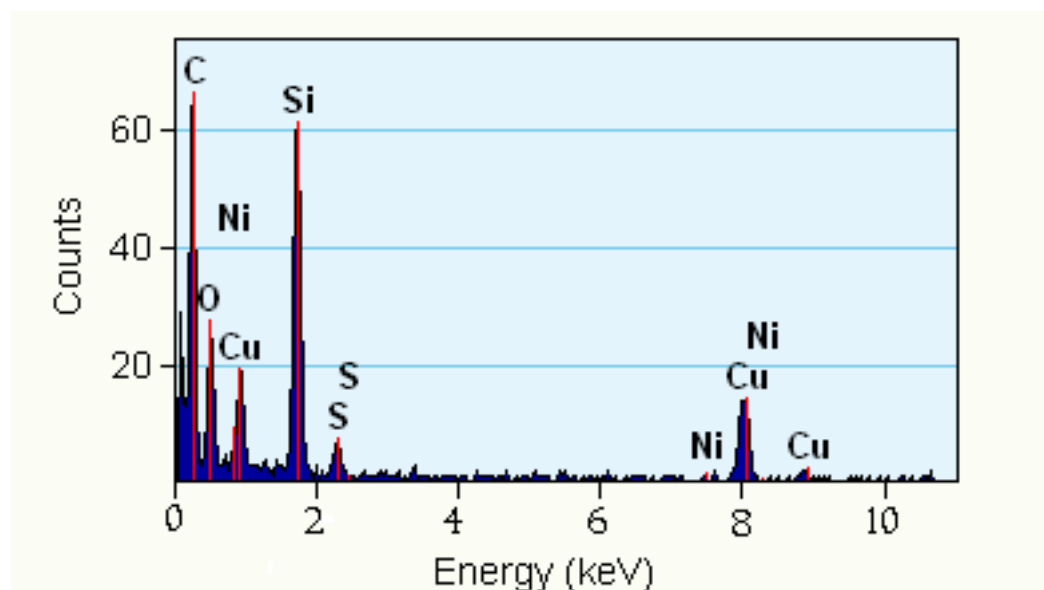

**Figure S1.** Energy-dispersive X-ray spectrum (EDS) of CuS NPs.

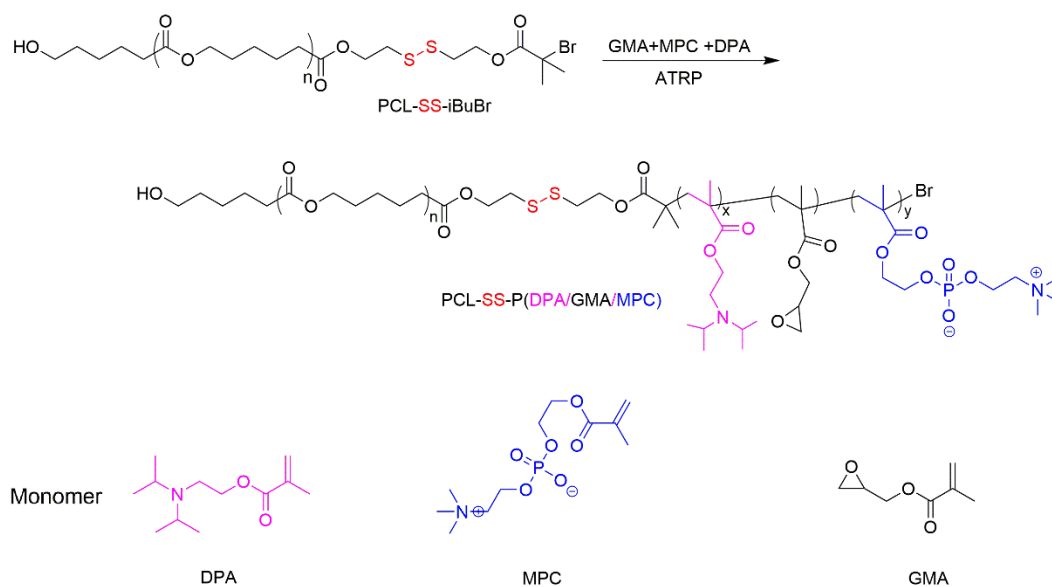

**Figure S2.** The synthesis route of pH/reductive dual responsive amphiphilic polymer PCL-SS-P(DPA/GMA/MPC).

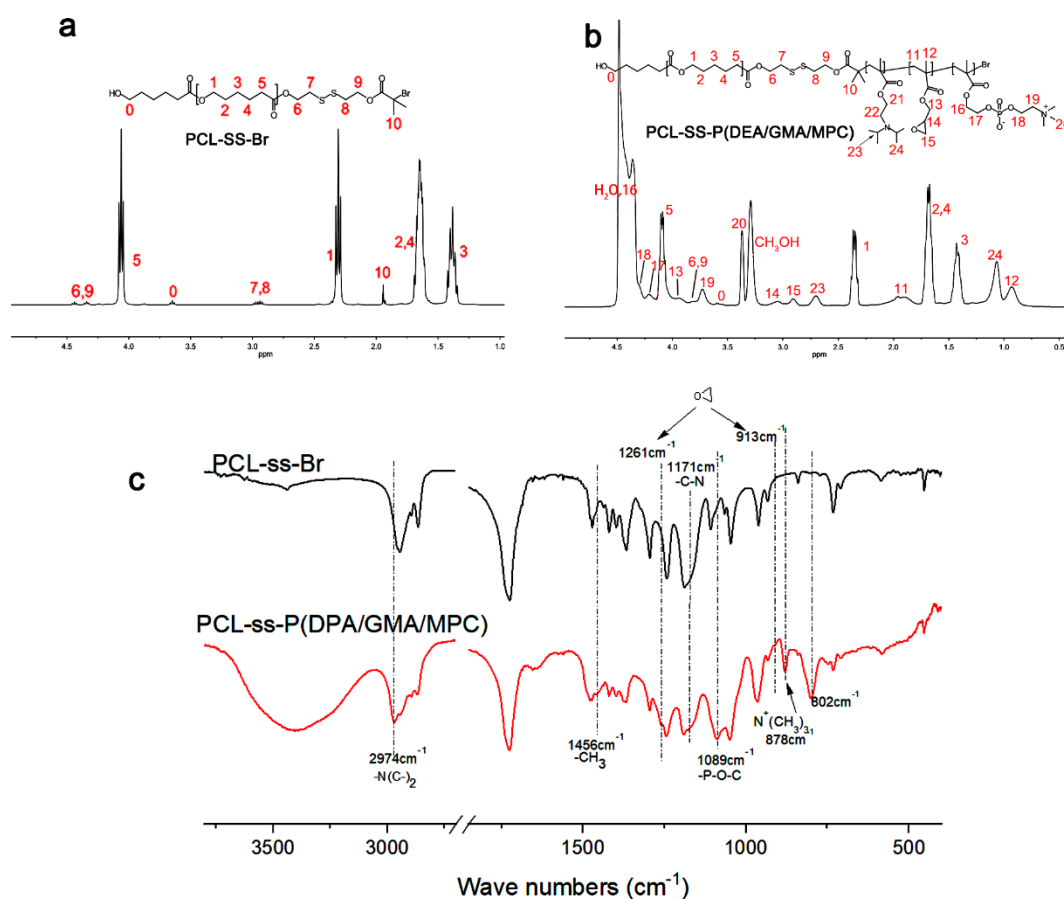

**Figure S3.** (a and b) Corresponding  $^1\text{H}$  NMR spectra of PCL-SS-Br in  $\text{CDCl}_3$  (a) and PCL-SS-P(DEA/GMA/MPC) in mixture of  $\text{CDCl}_3/\text{CD}_3\text{OD}=1:1$  (v/v). (c) FT-IR spectra of PCL-SS-Br and PCL-SS-P(DEA/GMA/MPC).

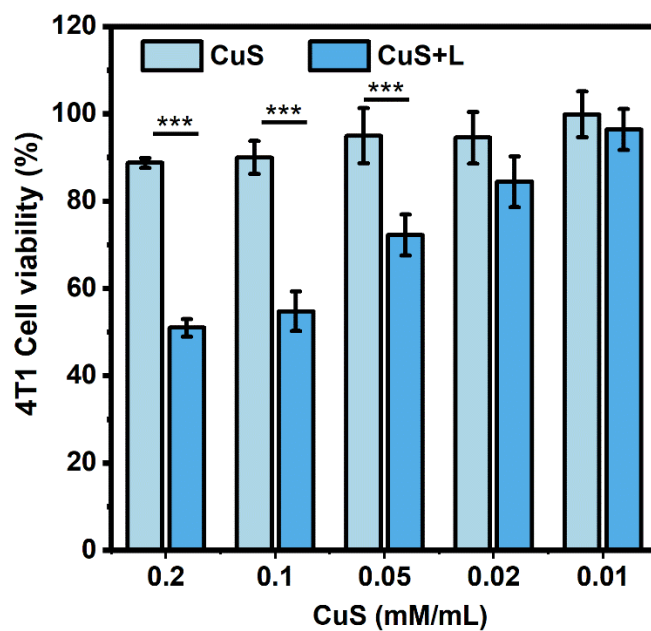

**Figure S4.** Relative viabilities 4T1 cells incubated with CuS NPs for 24 h. 4T1 cells were irradiated with laser for 5 min (808 nm, 2 W/cm<sup>2</sup>) at 4 h post CuS NPs were added.

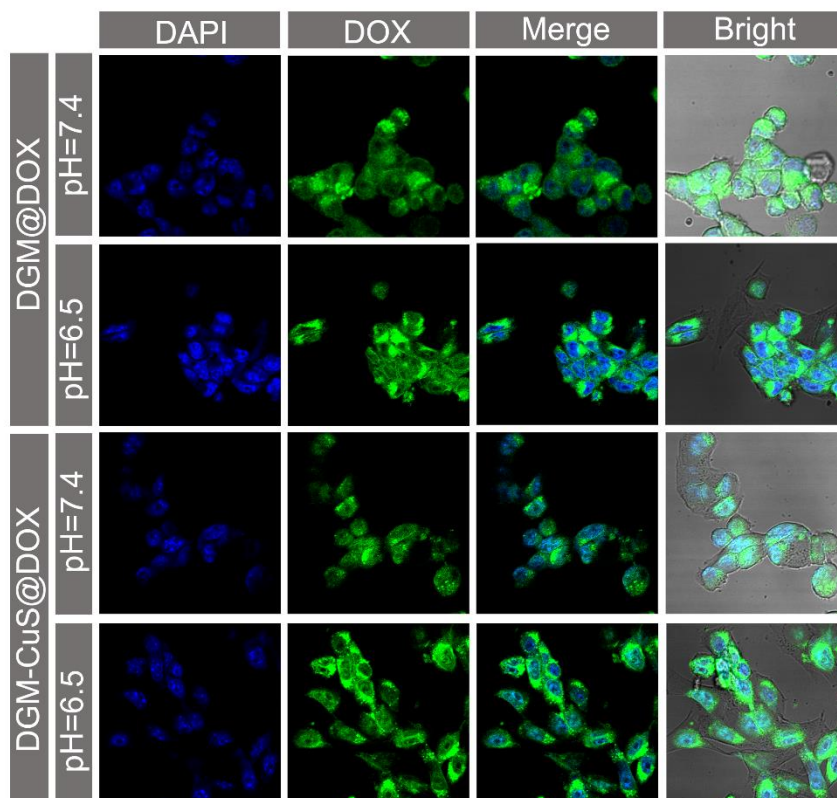

**Figure S5.** The cell cellular uptake of DGM@DOX and DGM-CuS@DOX after incubated with 4T1 cells for 2h at pH=6.5 and pH=7.4 culture medium respectively.

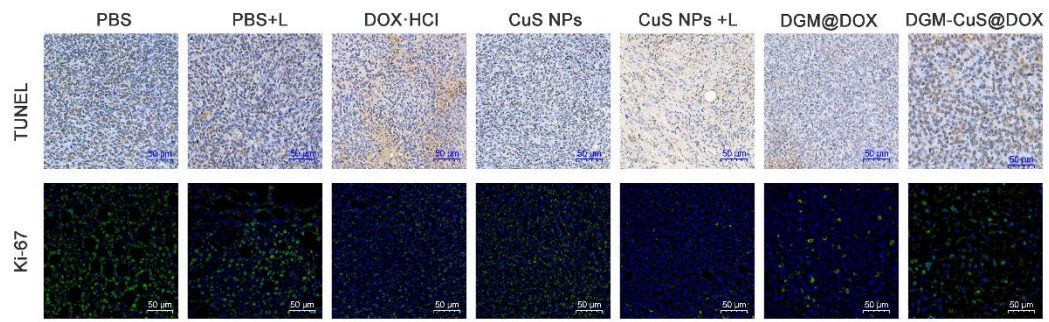

**Figure S6.** Pathological analysis of tumors tissues stained with TUNEL and Ki-67.
